# Supplementary material for: Preparation and photodynamic therapy application of NaYF4:Yb, Tm–NaYF4:Yb, Er multifunctional upconverting nanoparticles
Source: Royal Society of Chemistry journal article supplement (doi:10.1039/c3nj00065f), 2013-01-01
Supplement: c3nj00065f.pdf [file c3nj00065f.pdf]

## Supplementary Information for

# Preparation and Photodynamic Therapy Application of NaYF<sub>4</sub>:Yb,Tm/NaYF<sub>4</sub>:Yb,Er Multifunctional Upconverting Nanoparticles

Xiaolan Chen,\* Zengxia Zhao, Mengying Jiang, Daiping Que, Saige Shi, and  
Nanfeng Zheng\*

*State Key Laboratory of Physical Chemistry of Solid Surfaces and Department of Chemistry,  
College of Chemistry and Chemical Engineering, Xiamen University, Xiamen 361005, P.R. China.*

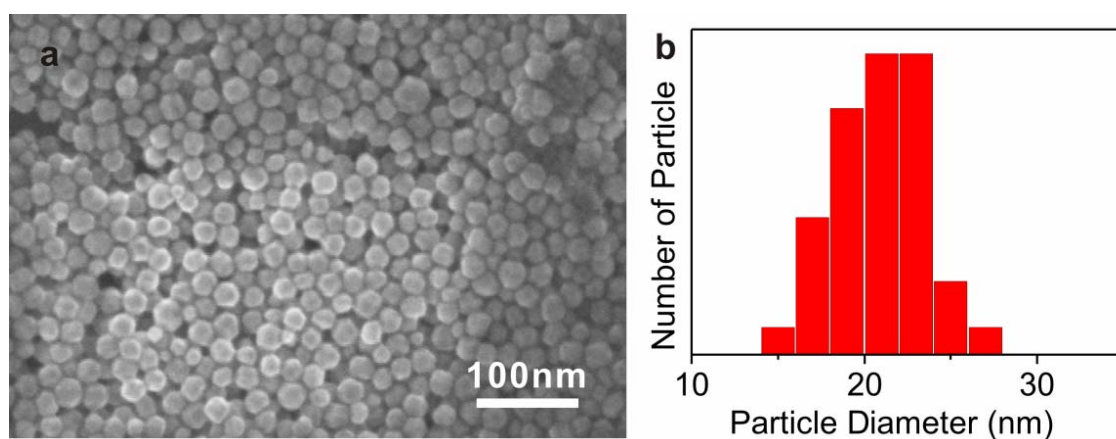

**Figure S1.** a) SEM images of the NaYF<sub>4</sub>:Yb<sup>3+</sup>,Tm<sup>3+</sup> core nanocrystals. b) Histogram of the particle sizes obtained from the SEM images.

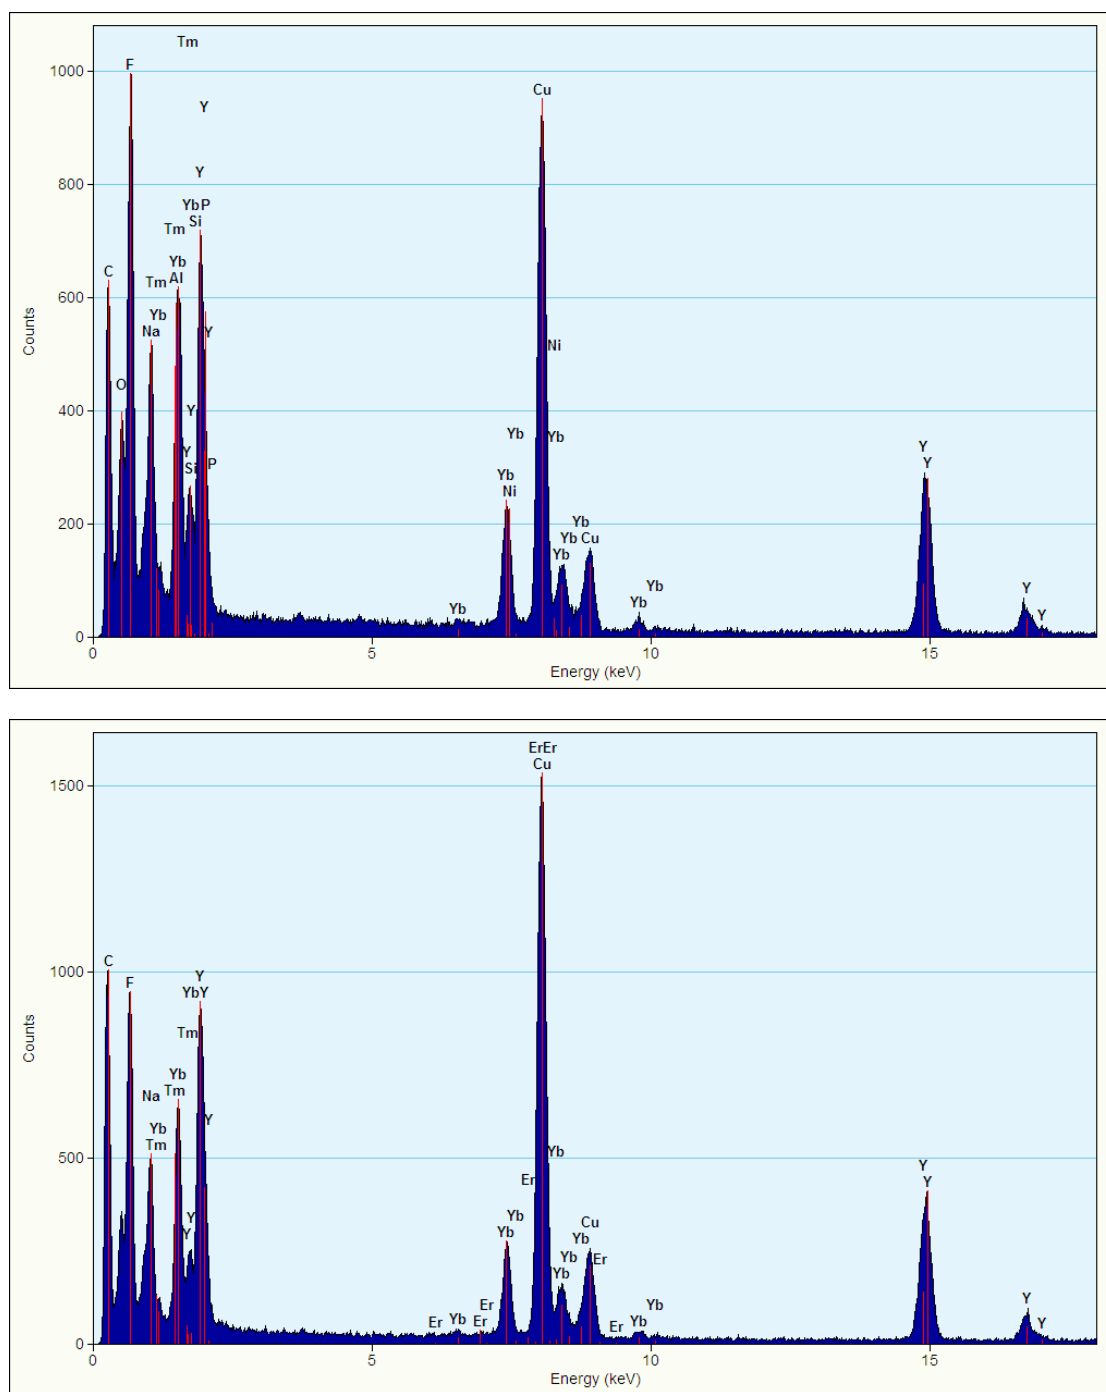

**Figure S2.** EDX results of the NaYF<sub>4</sub>:Yb<sup>3+</sup>, Tm<sup>3+</sup> core (upper) and the NaYF<sub>4</sub>:Yb<sup>3+</sup>, Tm<sup>3+</sup> / NaYF<sub>4</sub>:Yb<sup>3+</sup>, Er<sup>3+</sup> core-shell nanocrystals (UCNPs).

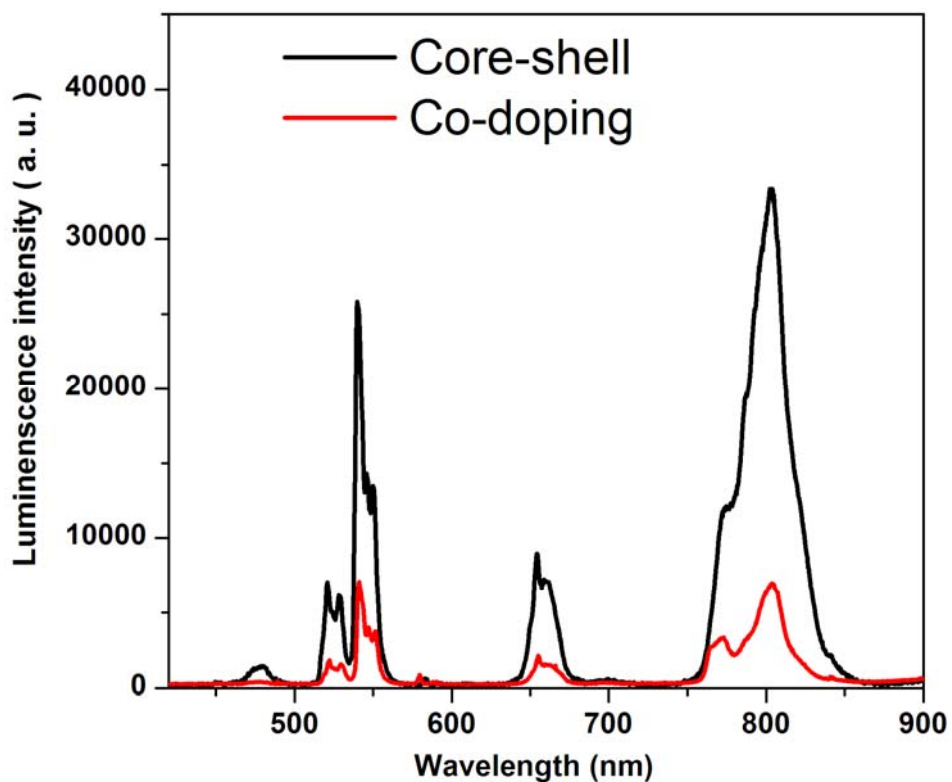

**Figure S3.** A comparison of the luminescence intensities between the core-shell and co-doped nanoparticles.

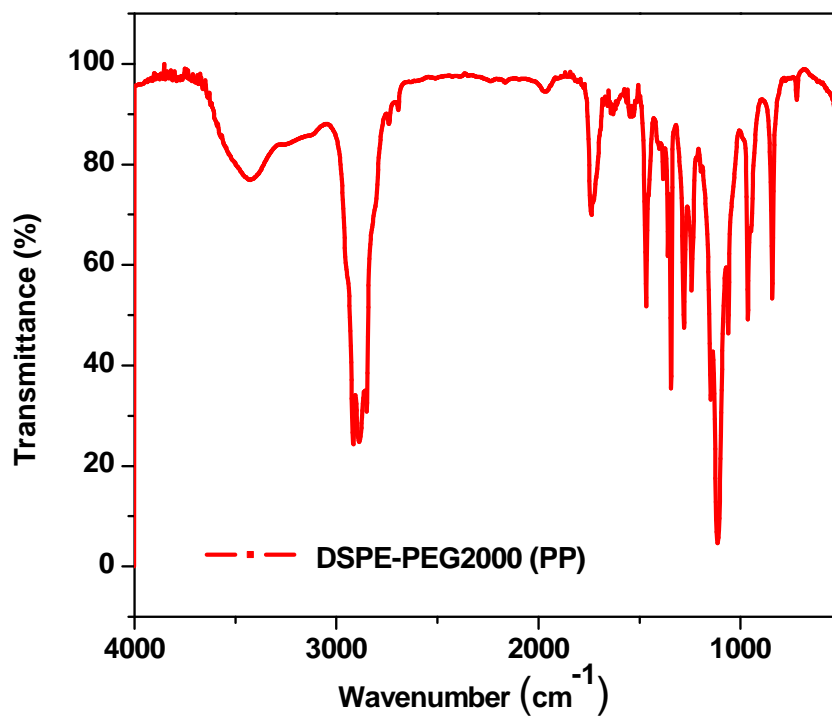

**Figure S4.** FTIR spectra of DSPE-PEG2000 (PP).

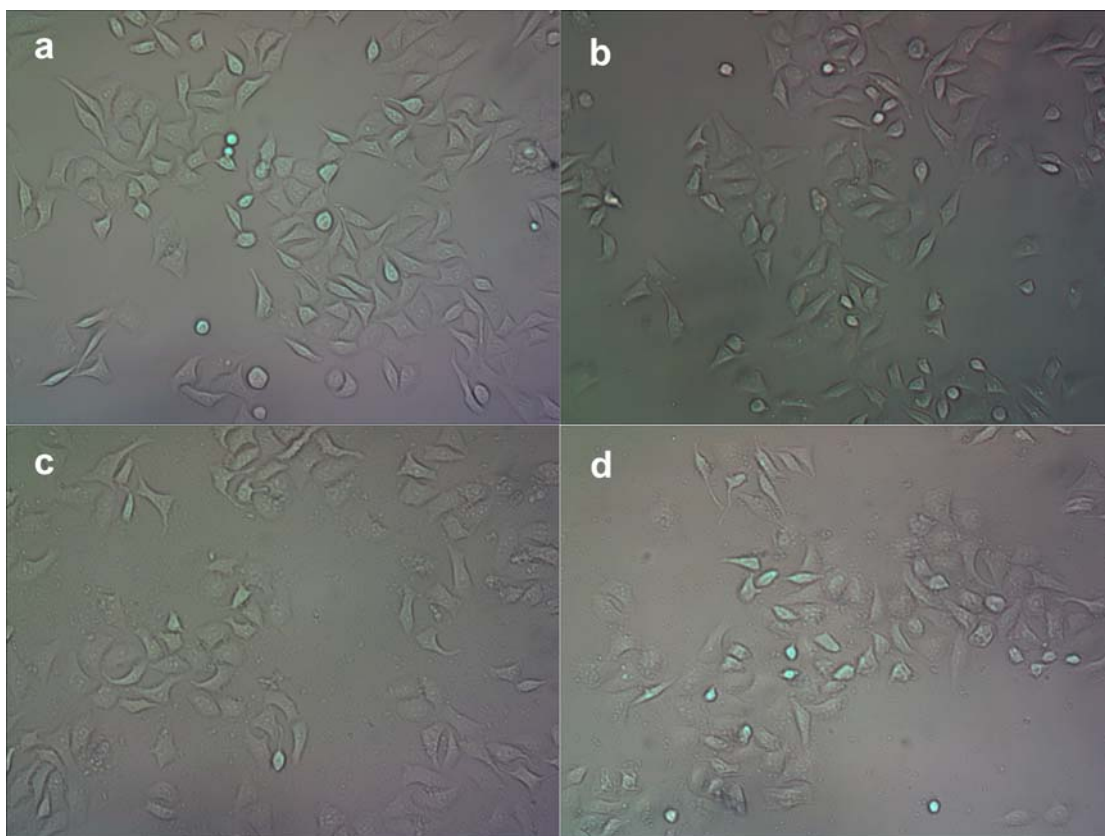

**Figure S5.** Some control experiments about optical imaging of 7703 liver cancer cells stained with trypan blue. a) without nanoparticles and without light exposure. b) without nanoparticles and with 5 min 980 nm laser exposure. c) with 100 µg/ml UCNP@PP and without light exposure; d) with 100 µg/ml UCNP@PP and 5 min 980 nm laser exposure.
